# Supplementary material for: Precipitation in the mountains of Central Asia: isotopic composition and source regions
Source: Copernicus journal article supplement (doi:10.5194/acp-24-12203-2024), 2024-11-04
Supplement: Supplementary file 1 [file acp-24-12203-2024-supplement.pdf]

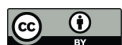

*Supplement of*

## **Precipitation in the mountains of Central Asia: isotopic composition and source regions**

**Zarina Saidaliyeva et al.**

*Correspondence to:* Zarina Saidaliyeva ([z.saidaliyeva@pgr.reading.ac.uk](mailto:z.saidaliyeva@pgr.reading.ac.uk))

The copyright of individual parts of the supplement might differ from the article licence.

**The file content:**

Table S1: Descriptive statistics of stable isotope ratios and *d-excess*. N is number of samples; SD is standard deviation.

Table S2: Stepwise regression equations for the meteorological seasons linking  $\delta^{18}\text{O}$ ,  $\delta\text{D}$ , and *d-excess* with latitude, longitude, and elevation. Predictors, statistically significant at 95% confidence level, are highlighted in bold and p-values are shown for every predictor in the order they are listed in the equations.

Table S3: Mean isotopic ratios for the warm ( $\delta_w$ ; May – October) and cold ( $\delta_c$ ; November – April) periods for all event-based samples.

Table S4: Regression between  $\delta^{18}\text{O}$  and  $\delta\text{D}$  and air temperature for each sampling site. Coefficients of determination are statistically significant at 95% confidence level at all sites except CHK3 (Tashkent).

Table S5: Summary of the OLSR calculations. SE is standard error.

Table S6: Slopes, intercepts, and standard deviations derived from different regression methods applied to the monthly-averaged and event-based data sets. Results of t-test comparing each regression method and OLSR are shown. N is a number of samples.

Table S7: Slopes, intercepts, and standard errors derived from different regressions methods applied to the event-based samples in each catchment. All metrics are as in Table S6.

Table S8: Slopes, intercepts, and standard errors derived from different regressions methods applied to the event-based precipitation in different seasons. All metrics are as in Table S6.

Table S9: Slopes, intercepts, and standard errors derived from different regressions methods applied to different types of precipitation. All metrics are as in Table S6.

Figure S1: Differences between data obtained in this study and the data from the Waterisotopes Database for (a)  $\delta^{18}\text{O}$ ; (b)  $\delta\text{D}$ .

Figure S2: Values of  $\delta^{18}\text{O}$  for each original cluster for each site and season: (a) UA1; (b) CKS2; (c) AA1; (d) CHK1.

Figure S3: Values of *d-excess* for each original cluster for each site and season: (a) UA1; (b) CKS2; (c) AA1; (d) CHK1.

Table S1: Descriptive statistics of stable isotope ratios and *d-excess*. N is number of samples; SD is standard deviation.

| Catchment                | Ulken Almaty (UA) |        |      |        |       | Chon Kyzyl Suu (CKS) |        |      |        |        | Ala Archa (AA) |        |      |        |       | Chirchik (CHK) |        |      |        |       |
|--------------------------|-------------------|--------|------|--------|-------|----------------------|--------|------|--------|--------|----------------|--------|------|--------|-------|----------------|--------|------|--------|-------|
| Temporal Resolution/Type | N                 | Mean   | SD   | Min    | Max   | N                    | Mean   | SD   | Min    | Max    | N              | Mean   | SD   | Min    | Max   | N              | Mean   | SD   | Min    | Max   |
| Oxygen, ‰                |                   |        |      |        |       |                      |        |      |        |        |                |        |      |        |       |                |        |      |        |       |
| January                  | 8                 | -22.5  | 5.9  | -33.6  | -12.1 | 7                    | -11.7  | 4.6  | -17.3  | -4.9   | 7              | -13.1  | 5.4  | -20.2  | -5.8  | 24             | -16.4  | 6.6  | -32.4  | -5.5  |
| February                 | 21                | -15.7  | 6.7  | -25.5  | -3.3  | 9                    | -16.4  | 6.6  | -23.8  | -1.7   | 16             | -12.6  | 4.8  | -22.1  | -6.6  | 53             | -10.1  | 5.1  | -23.8  | -0.1  |
| March                    | 25                | -12.7  | 4.2  | -20.7  | -7.2  | 9                    | -11.1  | 1.7  | -13.8  | -8.8   | 16             | -11.0  | 5.2  | -21.5  | -1.7  | 44             | -7.2   | 4.6  | -16.0  | 3.8   |
| April                    | 20                | -13.8  | 5.4  | -24.6  | -4.2  | 18                   | -12.0  | 5.1  | -20.4  | -3.4   | 9              | -9.5   | 5.7  | -14.9  | 1.9   | 35             | -7.4   | 5.5  | -17.8  | 3.3   |
| May                      | 37                | -9.0   | 3.4  | -13.2  | -0.1  | 33                   | -9.5   | 3.5  | -15.8  | -2.5   | 12             | -5.2   | 2.0  | -9.4   | -2.1  | 33             | -2.7   | 3.6  | -9.0   | 4.3   |
| June                     | 47                | -5.0   | 3.6  | -11.0  | 1.4   | 30                   | -5.4   | 4.1  | -12.8  | 6.0    | 5              | -5.0   | 2.3  | -8.0   | -2.4  | 17             | 0.2    | 4.2  | -13.0  | 4.3   |
| July                     | 45                | -4.1   | 4.0  | -12.3  | 6.1   | 31                   | -3.1   | 2.7  | -7.7   | 5.5    | 8              | -2.0   | 3.1  | -7.2   | 2.4   | 15             | -1.6   | 2.9  | -5.9   | 2.8   |
| August                   | 49                | -5.6   | 4.4  | -16.4  | 1.1   | 24                   | -5.3   | 3.1  | -11.6  | 0.7    | 15             | -0.4   | 5.2  | -10.6  | 8.6   | 11             | -4.0   | 4.2  | -12.9  | -0.2  |
| September                | 34                | -8.0   | 5.1  | -23.6  | 3.8   | 14                   | -6.3   | 3.9  | -12.1  | 2.8    | 6              | -3.4   | 5.3  | -8.8   | 3.2   | 4              | -4.9   | 3.6  | -10.0  | -1.8  |
| October                  | 30                | -12.7  | 4.1  | -19.7  | -6.5  | 5                    | -8.4   | 4.9  | -13.8  | -2.3   | 7              | -12.1  | 4.3  | -19.7  | -7.6  | 4              | -5.5   | 3.5  | -10.5  | -2.9  |
| November                 | 14                | -16.4  | 6.0  | -27.4  | -5.8  | 2                    | -19.2  | 1.6  | -20.4  | -18.1  | 7              | -12.6  | 4.8  | -21.1  | -6.1  | 14             | -18.8  | 6.6  | -30.8  | -11.7 |
| December                 | 8                 | -19.3  | 6.3  | -28.5  | -12.5 | 1                    | -15.4  | -    | -15.4  | -15.4  | 7              | -15.0  | 4.9  | -21.7  | -9.3  | 18             | -14.1  | 5.0  | -20.9  | -6.0  |
| DJF                      | 37                | -17.9  | 6.9  | -33.6  | -3.3  | 17                   | -14.4  | 5.9  | -23.8  | -1.7   | 30             | -13.3  | 4.9  | -22.1  | -5.8  | 95             | -12.5  | 6.1  | -32.4  | -0.1  |
| MAM                      | 82                | -11.3  | 4.7  | -24.6  | -0.1  | 60                   | -10.5  | 4.0  | -20.4  | -2.5   | 37             | -8.7   | 5.1  | -21.5  | 1.9   | 112            | -6.0   | 5.0  | -17.8  | 4.3   |
| JJA                      | 141               | -4.9   | 4.1  | -16.4  | 6.1   | 85                   | -4.6   | 3.5  | -12.8  | 6.0    | 28             | -1.7   | 4.5  | -10.6  | 8.6   | 43             | -1.5   | 4.0  | -13.0  | 4.3   |
| SON                      | 78                | -11.3  | 5.8  | -27.4  | 3.8   | 21                   | -8.0   | 5.4  | -20.4  | 2.8    | 20             | -9.7   | 6.2  | -21.1  | 3.2   | 22             | -13.8  | 8.7  | -30.8  | -1.8  |
| Annual                   | 338               | -9.4   | 6.6  | -33.6  | 6.1   | 183                  | -7.8   | 5.3  | -23.8  | 6.0    | 115            | -8.4   | 6.6  | -22.1  | 8.6   | 272            | -8.2   | 7.1  | -32.4  | 4.3   |
| Mixed                    | 45                | -8.5   | 3.6  | -16.4  | -0.1  | 14                   | -11.5  | 3.3  | -15.5  | -1.7   | 17             | -10.5  | 1.6  | -13.8  | -8.0  | 44             | -10.1  | 3.9  | -20.0  | -2.8  |
| Rain                     | 173               | -5.4   | 4.1  | -14.8  | 6.1   | 137                  | -5.7   | 3.8  | -15.8  | 6.0    | 66             | -4.2   | 4.6  | -12.9  | 8.6   | 152            | -4.0   | 4.7  | -16.5  | 4.3   |
| Snow                     | 120               | -15.4  | 5.7  | -33.6  | -3.3  | 32                   | -15.0  | 4.4  | -23.8  | -4.9   | 32             | -15.7  | 4.2  | -22.1  | -5.8  | 76             | -15.4  | 6.0  | -32.4  | -4.7  |
| Hydrogen, ‰              |                   |        |      |        |       |                      |        |      |        |        |                |        |      |        |       |                |        |      |        |       |
| January                  | 8                 | -168.9 | 49.7 | -258.8 | -78.8 | 7                    | -87.3  | 29.5 | -138.6 | -58.2  | 7              | -86.5  | 46.9 | -140.9 | -30.8 | 24             | -123.2 | 55.5 | -247.9 | -43.5 |
| February                 | 21                | -119.1 | 51.1 | -203.7 | -47.0 | 9                    | -125.3 | 45.4 | -186.5 | -39.8  | 16             | -82.9  | 40.5 | -166.4 | -32.8 | 53             | -68.5  | 44.7 | -188.0 | 11.8  |
| March                    | 25                | -87.3  | 32.7 | -148.5 | -48.9 | 9                    | -83.0  | 15.1 | -101.3 | -57.8  | 16             | -72.0  | 40.5 | -159.9 | -13.1 | 44             | -42.8  | 35.2 | -117.9 | 24.1  |
| April                    | 20                | -97.6  | 45.7 | -187.6 | -10.0 | 18                   | -87.9  | 40.8 | -156.9 | -3.9   | 9              | -61.1  | 43.8 | -103.8 | 27.3  | 35             | -47.4  | 44.3 | -128.6 | 29.7  |
| May                      | 37                | -56.3  | 26.5 | -92.7  | 3.4   | 33                   | -61.1  | 30.8 | -115.1 | 6.8    | 12             | -28.3  | 17.7 | -57.0  | -1.8  | 33             | -15.5  | 27.5 | -63.5  | 29.4  |
| June                     | 47                | -29.6  | 22.8 | -70.9  | 9.4   | 30                   | -32.5  | 26.3 | -85.3  | 17.1   | 5              | -34.7  | 14.5 | -48.0  | -14.0 | 17             | -0.1   | 28.1 | -89.2  | 36.5  |
| July                     | 45                | -23.9  | 24.6 | -76.3  | 38.2  | 31                   | -10.2  | 17.6 | -45.8  | 19.6   | 8              | -16.4  | 27.7 | -62.8  | 25.8  | 15             | -16.6  | 20.5 | -50.9  | 21.3  |
| August                   | 49                | -31.8  | 30.6 | -112.3 | 6.9   | 24                   | -22.8  | 23.2 | -71.3  | 18.9   | 15             | 2.7    | 28.9 | -63.2  | 45.2  | 11             | -18.3  | 29.3 | -82.0  | 10.2  |
| September                | 34                | -48.1  | 37.9 | -176.8 | 26.6  | 14                   | -27.9  | 26.5 | -68.7  | 30.0   | 6              | -12.6  | 32.7 | -53.2  | 24.9  | 4              | -32.0  | 29.8 | -68.6  | -4.4  |
| October                  | 30                | -87.3  | 30.6 | -142.3 | -47.9 | 5                    | -55.2  | 29.6 | -93.3  | -24.5  | 7              | -73.4  | 42.0 | -141.8 | -25.4 | 4              | -23.3  | 28.5 | -64.0  | -0.5  |
| November                 | 14                | -114.9 | 44.9 | -187.8 | -43.4 | 2                    | -140.0 | 6.5  | -144.7 | -135.4 | 7              | -76.0  | 40.1 | -151.9 | -42.3 | 14             | -134.9 | 55.3 | -237.1 | -78.3 |
| December                 | 8                 | -140.3 | 53.9 | -214.8 | -86.9 | 1                    | -102.6 | -    | -102.6 | -102.6 | 7              | -90.3  | 40.5 | -153.9 | -44.8 | 18             | -97.3  | 40.3 | -151.2 | -20.5 |
| DJF                      | 37                | -134.5 | 53.9 | -258.8 | -47.0 | 17                   | -108.3 | 41.4 | -186.5 | -39.8  | 30             | -85.5  | 40.6 | -166.4 | -30.8 | 95             | -87.8  | 52   | -247.9 | 11.8  |
| MAM                      | 82                | -75.8  | 38.1 | -187.6 | 3.4   | 60                   | -72.4  | 34.4 | -156.9 | 6.8    | 37             | -55.2  | 39.8 | -159.9 | 27.4  | 112            | -36.2  | 38.5 | -128.6 | 29.7  |
| JJA                      | 141               | -28.6  | 26.3 | -112.3 | 38.2  | 85                   | -21.6  | 24.2 | -85.3  | 19.6   | 28             | -9.4   | 29.6 | -63.2  | 45.2  | 43             | -10.5  | 26.8 | -89.22 | 36.5  |
| SON                      | 78                | -75.2  | 44.5 | -187.8 | 26.6  | 21                   | -45.1  | 42.1 | -144.7 | 30.0   | 20             | -56.1  | 46.9 | -151.9 | 24.9  | 22             | -95.9  | 70.2 | -237.1 | -0.5  |
| Annual                   | 338               | -62.4  | 50.3 | -258.8 | 38.2  | 183                  | -49.0  | 43.2 | -186.5 | 30.0   | 115            | -52.1  | 47.3 | -166.4 | 45.2  | 272            | -55    | 54.9 | -247.9 | 36.5  |
| Mixed                    | 45                | -52.6  | 26.4 | -112.3 | 5.5   | 14                   | -88.0  | 17.8 | -114.1 | -39.8  | 17             | -61.4  | 13.5 | -94.4  | -44.8 | 44             | -62.8  | 34.5 | -152.8 | -0.97 |
| Rain                     | 173               | -31.4  | 26.6 | -104.1 | 38.2  | 137                  | -30.6  | 28.4 | -115.1 | 30.0   | 66             | -22.8  | 29.9 | -83.0  | 45.2  | 152            | -24.3  | 34.4 | -119.9 | 36.5  |
| Snow                     | 120               | -110.8 | 45.7 | -258.8 | -10.5 | 32                   | -110.6 | 34.0 | -186.5 | -58.2  | 32             | -107.5 | 34.9 | -166.4 | -30.8 | 76             | -112   | 50.7 | -247.9 | -15.3 |
| <i>d-excess</i> , ‰      |                   |        |      |        |       |                      |        |      |        |        |                |        |      |        |       |                |        |      |        |       |
| January                  | 8                 | 10.8   | 7.9  | -4.9   | 18.1  | 7                    | 6.5    | 16.4 | -19.3  | 22.4   | 7              | 18.2   | 7.1  | 9.5    | 29.0  | 24             | 8.1    | 13.7 | -25.4  | 35.3  |
| February                 | 21                | 6.4    | 10.9 | -22.2  | 17.1  | 9                    | 5.6    | 13.3 | -26.1  | 15.7   | 16             | 18.0   | 4.8  | 9.0    | 25.9  | 53             | 12.6   | 10.3 | -18.2  | 34.1  |
| March                    | 25                | 14.0   | 6.7  | -3.7   | 23.1  | 9                    | 6.2    | 5.4  | -3.2   | 12.4   | 16             | 15.8   | 7.1  | -1.6   | 25.3  | 44             | 14.9   | 8.7  | -6.7   | 33.2  |
| April                    | 20                | 12.5   | 7.8  | -11.0  | 26.5  | 18                   | 7.9    | 9.2  | -19.1  | 23.3   | 9              | 14.9   | 3.7  | 7.5    | 20.0  | 35             | 11.8   | 6.0  | -1.8   | 24.5  |
| May                      | 37                | 15.8   | 6.7  | -8.3   | 24.4  | 33                   | 14.5   | 4.8  | 4.5    | 27.1   | 12             | 13.5   | 5.5  | 6.8    | 23.7  | 33             | 6.5    | 9.3  | -12.2  | 21.2  |

|           |     |      |      |       |      |     |      |      |       |      |     |      |      |       |      |     |      |      |       |      |
|-----------|-----|------|------|-------|------|-----|------|------|-------|------|-----|------|------|-------|------|-----|------|------|-------|------|
| June      | 47  | 10.5 | 9.9  | -14.5 | 23.0 | 30  | 10.7 | 9.9  | -31.0 | 21.1 | 5   | 5.1  | 7.6  | -2.2  | 17.4 | 17  | -1.7 | 9.2  | -15.7 | 14.9 |
| July      | 45  | 8.8  | 11.5 | -26.5 | 23.1 | 31  | 14.9 | 9.7  | -26.3 | 27.1 | 8   | -0.1 | 8.7  | -14.9 | 11.8 | 15  | -3.5 | 9.1  | -25.2 | 10.0 |
| August    | 49  | 13.1 | 7.5  | -5.1  | 24.1 | 24  | 19.8 | 6.5  | -0.2  | 29.1 | 15  | 6.2  | 17.6 | -23.8 | 46.4 | 11  | 13.4 | 8.4  | -4.1  | 23.8 |
| September | 34  | 15.8 | 8.1  | -4.0  | 29.1 | 14  | 22.4 | 5.4  | 7.5   | 28.3 | 6   | 14.3 | 14.4 | -0.9  | 40.4 | 4   | 6.8  | 10.3 | -5.5  | 18.4 |
| October   | 30  | 14.1 | 8.0  | -5.0  | 29.3 | 5   | 11.6 | 11.5 | -5.9  | 22.4 | 7   | 23.5 | 11.2 | 13.1  | 41.1 | 4   | 20.6 | 1.5  | 19.8  | 22.8 |
| November  | 14  | 16.5 | 9.9  | 3.1   | 31.1 | 2   | 13.8 | 6.2  | 9.4   | 18.2 | 7   | 24.8 | 17.4 | 6.2   | 54.2 | 14  | 15.5 | 5.4  | 8.7   | 26.3 |
| December  | 8   | 14.2 | 6.1  | 6.2   | 25.9 | 1   | 20.9 | *    | 20.9  | 20.9 | 7   | 29.5 | 13.6 | 11.1  | 45.7 | 18  | 15.8 | 5.5  | 6.4   | 30.1 |
| DJF       | 37  | 9.0  | 9.8  | -22.2 | 25.9 | 17  | 6.9  | 14.3 | -26.1 | 22.4 | 30  | 20.7 | 9.2  | 9.0   | 45.7 | 95  | 12.1 | 10.8 | -25.4 | 35.3 |
| MAM       | 82  | 14.5 | 7.0  | -11.0 | 26.5 | 60  | 11.3 | 7.4  | -19.1 | 27.1 | 37  | 14.8 | 5.9  | -1.6  | 25.3 | 112 | 11.4 | 8.8  | -12.2 | 33.2 |
| JJA       | 141 | 10.9 | 9.8  | -26.5 | 24.1 | 85  | 14.8 | 9.6  | -31.0 | 29.1 | 28  | 4.2  | 14.0 | -23.8 | 46.4 | 43  | 1.5  | 11.2 | -25.2 | 23.8 |
| SON       | 78  | 15.2 | 8.3  | -5.0  | 31.1 | 21  | 19.0 | 8.5  | -5.9  | 28.3 | 20  | 21.2 | 14.5 | -0.9  | 54.2 | 22  | 14.9 | 7.2  | -5.5  | 26.3 |
| Annual    | 338 | 12.5 | 9.1  | -26.5 | 31.1 | 183 | 13.4 | 9.8  | -31.0 | 29.1 | 115 | 14.9 | 12.6 | -23.8 | 54.2 | 272 | 10.4 | 10.6 | -25.4 | 35.3 |
| Mixed     | 45  | 15.2 | 7.2  | -8.3  | 25.4 | 14  | 3.7  | 10.7 | -26.1 | 18.4 | 17  | 22.8 | 10.7 | 13.1  | 54.2 | 44  | 17.6 | 7.8  | 1.8   | 35.3 |
| Rain      | 173 | 11.9 | 9.9  | -26.5 | 29.3 | 137 | 15.3 | 9.1  | -31.0 | 29.1 | 66  | 11.2 | 13.5 | -23.8 | 46.4 | 152 | 7.8  | 10.1 | -25.2 | 29.6 |
| Snow      | 120 | 12.5 | 8.5  | -22.2 | 31.1 | 32  | 9.7  | 8.9  | -19.3 | 22.4 | 32  | 18.4 | 8.0  | 7.1   | 45.7 | 76  | 11.3 | 10.9 | -25.4 | 31.3 |

Table S2: Stepwise regression equations for the meteorological seasons linking  $\delta^{18}\text{O}$ ,  $\delta\text{D}$ , and  $d\text{-excess}$  with latitude, longitude, and elevation. Predictors, statistically significant at 95% confidence level, are highlighted in bold and p-values are shown for every predictor in the order they are listed in the equations.

| Season | $\delta^{18}\text{O}$                                                                                                    | $\delta\text{D}$                                                                                                    | $d\text{-excess}$                                                                                                  |
|--------|--------------------------------------------------------------------------------------------------------------------------|---------------------------------------------------------------------------------------------------------------------|--------------------------------------------------------------------------------------------------------------------|
| DJF    | $\delta^{18}\text{O}_{\text{DJF}} = -15.8 - 0.04\text{Lat} + 0.15\text{Lon} - \mathbf{0.005E}$<br>(0.97; 0.56; <0.01)    | $\delta\text{D}_{\text{DJF}} = -223 + 1.94\text{Lat} + 1.57\text{Lon} - \mathbf{0.04E}$<br>(0.81; 0.47; <0.01)      | $d\text{-excess}_{\text{DJF}} = -96.5 + 2.26\text{Lat} + 0.34\text{Lon} - \mathbf{0.007E}$<br>(0.24; 0.50; 0.02)   |
| MAM    | $\delta^{18}\text{O}_{\text{MAM}} = 51.8 - 0.84\text{Lat} - 0.29\text{Lon} - 0.002E$<br>(0.19; 0.09; 0.05)               | $\delta\text{D}_{\text{MAM}} = 427 - 5.84\text{Lat} - \mathbf{2.94Lon} - 0.009E$<br>(0.25; 0.03; 0.18)              | $d\text{-excess}_{\text{MAM}} = 12.8 + 0.89\text{Lat} - \mathbf{0.61Lon} - \mathbf{0.002E}$<br>(0.40; 0.03; <0.01) |
| JJA    | $\delta^{18}\text{O}_{\text{JJA}} = 30.3 - 0.66\text{Lat} - 0.01\text{Lon} - \mathbf{0.002E}$<br>(0.24; 0.95; 0.02)      | $\delta\text{D}_{\text{JJA}} = 302 - \mathbf{7.89Lat} + 0.49\text{Lon} - 0.01E$<br>(0.03; 0.71; 0.08)               | $d\text{-excess}_{\text{JJA}} = 58.9 - 2.59\text{Lat} + 0.59\text{Lon} + \mathbf{0.001E}$<br>(0.08; 0.26; <0.01)   |
| SON    | $\delta^{18}\text{O}_{\text{SON}} = -29.9 - 2.02\text{Lat} + \mathbf{1.51Lon} - \mathbf{0.004E}$<br>(0.06; <0.01; <0.01) | $\delta\text{D}_{\text{SON}} = -306 - \mathbf{16.97Lat} + \mathbf{13.9Lon} - \mathbf{0.04E}$<br>(0.04; <0.01; 0.03) | $d\text{-excess}_{\text{SON}} = -66.4 - 0.83\text{Lat} + \mathbf{1.80Lon} - \mathbf{0.01E}$<br>(0.59; 0.02; 0.03)  |

Table S3: Mean isotopic ratios for the warm ( $\delta_w$ ; May – October) and cold ( $\delta_c$ ; November – April) periods for all event-based samples.

| Period                | Oxygen, ‰ |       |       |       | Hydrogen, ‰ |       |       |       |
|-----------------------|-----------|-------|-------|-------|-------------|-------|-------|-------|
|                       | UA        | CKS   | AA    | CHK   | UA          | CKS   | AA    | CHK   |
| May – October         | -6.9      | -6.0  | -4.1  | -2.3  | -42.8       | -33.0 | -22.5 | -14.1 |
| November – April      | -15.5     | -13.0 | -12.1 | -10.8 | -111.6      | -96.7 | -77.4 | -73.2 |
| $\delta_w - \delta_c$ | 8.6       | 7.0   | 8.0   | 8.5   | 68.8        | 63.7  | 54.9  | 59.1  |

Table S4: Regression between  $\delta^{18}\text{O}$  and  $\delta\text{D}$  and air temperature for each sampling site. Coefficients of determination are statistically significant at 95% confidence level at all sites except CHK3 (Tashkent).

| Sampling site                  | $\delta^{18}\text{O}$                                 |                | $\delta\text{D}$                                 |                |
|--------------------------------|-------------------------------------------------------|----------------|--------------------------------------------------|----------------|
|                                | Equation                                              | R <sup>2</sup> | Equation                                         | R <sup>2</sup> |
| Bolshoe Almatinskoe Lake (BAL) | $\delta^{18}\text{O}_{\text{Annual}} = 0.69t - 10.45$ | 0.59           | $\delta\text{D}_{\text{Annual}} = 5.33t - 70.76$ | 0.60           |
| Lesnoy Cordon                  | $\delta^{18}\text{O}_{\text{Annual}} = 0.67t - 11.72$ | 0.46           | $\delta\text{D}_{\text{Annual}} = 5.50t - 81.25$ | 0.49           |
| Baityk                         | $\delta^{18}\text{O}_{\text{Annual}} = 0.60t - 11.35$ | 0.66           | $\delta\text{D}_{\text{Annual}} = 4.10t - 72.33$ | 0.59           |
| Tashkent                       | $\delta^{18}\text{O}_{\text{Annual}} = 0.32t - 9.06$  | 0.27           | $\delta\text{D}_{\text{Annual}} = 2.46t - 61.53$ | 0.27           |
| Pskem                          | $\delta^{18}\text{O}_{\text{Annual}} = 0.55t - 9.85$  | 0.54           | $\delta\text{D}_{\text{Annual}} = 3.79t - 63.08$ | 0.47           |
| Oygaing                        | $\delta^{18}\text{O}_{\text{Annual}} = 0.74t - 10.09$ | 0.64           | $\delta\text{D}_{\text{Annual}} = 5.50t - 81.25$ | 0.56           |

Table S5: Summary of the OLSR calculations. SE is standard error.

| Region / catchment | Slope | SE   | Intersept | SE    | R <sup>2</sup> | n   |
|--------------------|-------|------|-----------|-------|----------------|-----|
| CA (all samples)   | 7.56  | 0.05 | 8.65      | 0.54  | 0.96           | 909 |
| CA (DJF)           | 8.10  | 0.13 | 13.78     | 2.06  | 0.95           | 179 |
| CA (MAM)           | 7.75  | 0.09 | 10.52     | 0.88  | 0.97           | 291 |
| CA (JJA)           | 6.17  | 0.12 | 2.66      | 0.70  | 0.90           | 297 |
| CA (SON)           | 7.72  | 0.12 | 13.50     | 1.53  | 0.97           | 142 |
| CA (rain)          | 6.64  | 0.09 | 4.74      | 0.58  | 0.91           | 529 |
| CA (mixed)         | 7.73  | 0.25 | 13.21     | 2.57  | 0.89           | 120 |
| CA (snow)          | 7.95  | 0.11 | 11.77     | 1.74  | 0.96           | 260 |
| UA (all samples)   | 7.56  | 0.07 | 8.41      | 0.82  | 0.97           | 338 |
| UA (DJF)           | 7.69  | 0.23 | 3.52      | 4.49  | 0.97           | 37  |
| UA (MAM)           | 8.04  | 0.17 | 14.89     | 2.04  | 0.97           | 82  |
| UA (JJA)           | 6.27  | 0.14 | 2.36      | 0.91  | 0.93           | 141 |
| UA (SON)           | 7.50  | 0.15 | 9.55      | 1.95  | 0.97           | 78  |
| UA (rain)          | 6.29  | 0.13 | 2.63      | 0.88  | 0.93           | 173 |
| UA (mixed)         | 7.16  | 0.28 | 8.09      | 2.55  | 0.94           | 45  |
| UA (snow)          | 7.83  | 0.13 | 9.88      | 2.22  | 0.97           | 120 |
| CKS (all samples)  | 7.87  | 0.14 | 12.42     | 1.29  | 0.95           | 183 |
| CKS (DJF)          | 6.68  | 0.52 | -12.14    | 8.04  | 0.91           | 17  |
| CKS (MAM)          | 8.41  | 0.24 | 15.57     | 2.63  | 0.96           | 60  |
| CKS (JJA)          | 6.54  | 0.26 | 8.16      | 1.46  | 0.89           | 85  |
| CKS (SON)          | 7.60  | 0.35 | 15.79     | 3.33  | 0.96           | 21  |
| CKS (rain)         | 7.09  | 0.19 | 10.02     | 1.30  | 0.91           | 137 |
| CKS (mixed)        | 5.21  | 0.50 | -28.33    | 5.90  | 0.89           | 14  |
| CKS (snow)         | 7.46  | 0.35 | 1.58      | 5.54  | 0.93           | 32  |
| AA (all samples)   | 7.01  | 0.15 | 6.62      | 1.64  | 0.95           | 115 |
| AA (DJF)           | 8.05  | 0.35 | 21.36     | 5.01  | 0.95           | 30  |
| AA (MAM)           | 7.69  | 0.19 | 12.13     | 1.89  | 0.98           | 37  |
| AA (JJA)           | 6.09  | 0.48 | 0.96      | 2.29  | 0.85           | 28  |
| AA (SON)           | 7.25  | 0.53 | 14.00     | 5.99  | 0.91           | 20  |
| AA (rain)          | 6.08  | 0.28 | 3.00      | 1.72  | 0.88           | 66  |
| AA (mixed)         | 5.74  | 1.65 | -1.05     | 17.56 | 0.41           | 17  |
| AA (snow)          | 8.08  | 0.35 | 19.65     | 5.63  | 0.95           | 32  |
| CHK (all samples)  | 7.66  | 0.09 | 7.65      | 0.99  | 0.96           | 272 |
| CHK (DJF)          | 8.38  | 0.18 | 16.74     | 2.51  | 0.96           | 95  |
| CHK (MAM)          | 7.45  | 0.16 | 8.17      | 1.23  | 0.95           | 112 |
| CHK (JJA)          | 6.15  | 0.35 | -2.00     | 1.60  | 0.90           | 43  |
| CHK (SON)          | 8.05  | 0.19 | 15.53     | 3.01  | 0.99           | 22  |
| CHK (rain)         | 7.09  | 0.16 | 4.11      | 1.02  | 0.93           | 145 |
| CHK (mixed)        | 8.60  | 0.29 | 23.68     | 3.15  | 0.95           | 52  |
| CHK (snow)         | 8.22  | 0.20 | 14.67     | 3.35  | 0.96           | 75  |

Table S6: Slopes, intercepts, and standard deviations derived from different regression methods applied to the monthly-averaged and event-based data sets. Results of t-test comparing each regression method and OLSR are shown. N is a number of samples. The metrics are as follows: slope of regression line (a), standard deviation of the slope (sa), intercept of regression line (b), standard deviation of the intercept (sb), average value of the sum of the squared errors of three methods, either OLSR, RMA and MA or three precipitation-weighted regressions, root mean Sum of Squared Errors (RMSSE). The proximity of the RMSSE values to 1.0 is an indicator of the suitability of a regression method for the analysed data set.

| Monthly     | N   | a      | sa     | b       | sb     | RMSSE  | t-value | p-value |
|-------------|-----|--------|--------|---------|--------|--------|---------|---------|
| OLSR        | 137 | 7.5778 | 0.1182 | 9.7101  | 1.2355 | 1.0074 |         |         |
| RMA         | 137 | 7.7012 | 0.1173 | 10.7859 | 1.2279 | 1.0026 | 0.7378  | 0.46    |
| MA          | 137 | 7.8224 | 0.1206 | 11.8433 | 1.2607 | 1.0057 | 1.4549  | 0.15    |
| PWLSR       | 137 | 7.7358 | 0.1165 | 12.1886 | 1.0953 | 1.0012 | 0.9331  | 0.35    |
| PWRMA       | 137 | 7.8533 | 0.1171 | 13.1535 | 1.1005 | 1.0049 | 1.6181  | 0.11    |
| PWMA        | 137 | 7.9689 | 0.1182 | 14.1021 | 1.111  | 1.0152 | 2.2763  | 0.03    |
| Event-based | N   | a      | sa     | b       | sb     | RMSSE  | t-value |         |
| OLSR        | 869 | 7.5606 | 0.0509 | 8.8169  | 0.5436 | 1.0079 |         |         |
| RMA         | 869 | 7.7075 | 0.0508 | 10.0619 | 0.544  | 1.0031 | 2.0376  | 0.04    |
| MA          | 869 | 7.8524 | 0.0518 | 11.2895 | 0.5538 | 1.0078 | 4.0184  | <0.01   |
| PWLSR       | 869 | 7.8576 | 0.0508 | 14.2822 | 0.5326 | 1      | 3.9999  | <0.01   |
| PWRMA       | 869 | 7.9987 | 0.051  | 15.5161 | 0.5349 | 1.0123 | 5.8342  | <0.01   |
| PWMA        | 869 | 8.1379 | 0.0517 | 16.7339 | 0.5419 | 1.0313 | 7.5758  | <0.01   |

Table S7: Slopes, intercepts, and standard errors derived from different regressions methods applied to the event-based samples in each catchment. All metrics are as in Table S6.

| Ulken Almaty (UA)    | N   | a      | sa     | b       | sb     | RMSSE  | t-value | p-value |
|----------------------|-----|--------|--------|---------|--------|--------|---------|---------|
| OLSR                 | 332 | 7.5437 | 0.0721 | 8.3315  | 0.8212 | 1.0061 |         |         |
| RMA                  | 332 | 7.6564 | 0.0718 | 9.3836  | 0.8197 | 1.0024 | 1.1042  | 0.27    |
| MA                   | 332 | 7.767  | 0.0731 | 10.4159 | 0.833  | 1.006  | 2.1758  | 0.03    |
| PWLSR                | 332 | 7.8049 | 0.0748 | 12.6969 | 0.8637 | 1      | 2.5067  | 0.01    |
| PWRMA                | 332 | 7.9221 | 0.075  | 13.8732 | 0.8669 | 1.0144 | 3.591   | <0.01   |
| PWMA                 | 332 | 8.0374 | 0.0758 | 15.0299 | 0.8762 | 1.0348 | 4.6175  | <0.01   |
| Chon Kyzyl Suu (CKS) | N   | a      | sa     | b       | sb     | RMSSE  | t-value |         |
| OLSR                 | 149 | 7.9449 | 0.1457 | 14.2324 | 1.2822 | 1.0099 |         |         |
| RMA                  | 149 | 8.139  | 0.1447 | 15.6373 | 1.276  | 1.0039 | 0.939   | 0.35    |
| MA                   | 149 | 8.332  | 0.1492 | 17.0342 | 1.3126 | 1.0098 | 1.8561  | 0.07    |
| PWLSR                | 149 | 8.4272 | 0.1154 | 20.8734 | 1.0011 | 1      | 2.2304  | 0.03    |
| PWRMA                | 149 | 8.5426 | 0.1158 | 21.7223 | 1.0045 | 1.0101 | 2.7389  | 0.01    |
| PWMA                 | 149 | 8.6565 | 0.117  | 22.5598 | 1.0145 | 1.0231 | 3.2258  | <0.01   |
| Ala Archa (AA)       | N   | a      | sa     | b       | sb     | RMSSE  | t-value |         |
| OLSR                 | 115 | 7.0141 | 0.1545 | 6.6244  | 1.641  | 1.0109 |         |         |
| RMA                  | 115 | 7.2037 | 0.1531 | 8.2119  | 1.6308 | 1.0043 | 0.8652  | 0.39    |
| MA                   | 115 | 7.3912 | 0.1585 | 9.7814  | 1.6837 | 1.0108 | 1.704   | 0.09    |
| PWLSR                | 115 | 7.117  | 0.1559 | 9.4696  | 1.8109 | 1.0028 | 0.4668  | 0.47    |
| PWRMA                | 115 | 7.3073 | 0.1569 | 11.3159 | 1.8228 | 1.0074 | 1.3178  | 0.19    |
| PWMA                 | 115 | 7.4956 | 0.1599 | 13.1428 | 1.8576 | 1.0243 | 2.1311  | 0.04    |
| Chirchik (CHK)       | N   | a      | sa     | b       | sb     | RMSSE  | t-value |         |
| OLSR                 | 272 | 7.6396 | 0.0885 | 7.4144  | 0.954  | 1.0073 |         |         |
| RMA                  | 272 | 7.7767 | 0.0881 | 8.5341  | 0.9523 | 1.0029 | 1.0933  | 0.28    |
| MA                   | 272 | 7.9117 | 0.09   | 9.6371  | 0.9706 | 1.0072 | 2.1562  | 0.03    |
| PWLSR                | 272 | 7.7797 | 0.0869 | 11.3965 | 0.9194 | 1.0013 | 1.0966  | 0.27    |
| PWRMA                | 272 | 7.9097 | 0.0873 | 12.4983 | 0.9232 | 1.0056 | 2.0997  | 0.04    |
| PWMA                 | 272 | 8.0376 | 0.0883 | 13.5835 | 0.9342 | 1.0166 | 3.064   | <0.01   |

Table S8: Slopes, intercepts, and standard errors derived from different regressions methods applied to the event-based precipitation in different seasons. All metrics are as in Table S6.

| Event-based DJF | N   | a      | sa     | b       | sb     | rmSSEav | t-value | p-value |
|-----------------|-----|--------|--------|---------|--------|---------|---------|---------|
| OLSR            | 168 | 8.1417 | 0.1354 | 14.6149 | 2.073  | 1.0092  |         |         |
| RMA             | 168 | 8.3266 | 0.1346 | 17.1842 | 2.0626 | 1.0036  | 0.9626  | 0.34    |
| MA              | 168 | 8.5104 | 0.1384 | 19.738  | 2.1187 | 1.0091  | 1.9036  | 0.06    |
| PWLSR           | 168 | 8.0465 | 0.1349 | 15.2372 | 1.992  | 1.018   | 0.4931  | 0.62    |
| PWRMA           | 168 | 8.2321 | 0.1357 | 17.7164 | 2.0034 | 1.0048  | 0.4685  | 0.64    |
| PWMA            | 168 | 8.4165 | 0.1379 | 20.1798 | 2.0367 | 1.0031  | 1.4176  | 0.16    |
| Event-based MAM | N   | a      | sa     | b       | sb     | rmSSEav | t-value |         |
| OLSR            | 273 | 7.7301 | 0.0867 | 10.7352 | 0.8727 | 1.0069  |         |         |
| RMA             | 273 | 7.8607 | 0.0863 | 11.855  | 0.8705 | 1.0027  | 1.0629  | 0.29    |
| MA              | 273 | 7.9892 | 0.0881 | 12.9578 | 0.887  | 1.0068  | 2.0968  | 0.04    |
| PWLSR           | 273 | 8.0178 | 0.0826 | 14.5088 | 0.8818 | 1       | 2.3071  | 0.02    |
| PWRMA           | 273 | 8.1324 | 0.0829 | 15.5757 | 0.8849 | 1.0127  | 3.1927  | <0.01   |
| PWMA            | 273 | 8.2451 | 0.0838 | 16.6258 | 0.894  | 1.0304  | 4.0353  | <0.01   |
| Event-based JJA | N   | a      | sa     | b       | sb     | rmSSEav | t-value |         |
| OLSR            | 290 | 6.2077 | 0.1185 | 2.8686  | 0.6886 | 1.0205  |         |         |
| RMA             | 290 | 6.5255 | 0.1181 | 4.1605  | 0.6906 | 1.0079  | 1.8841  | 0.06    |
| MA              | 290 | 6.8446 | 0.1243 | 5.4575  | 0.7223 | 1.0202  | 3.7075  | <0.01   |
| PWLSR           | 290 | 6.8188 | 0.135  | 9.7689  | 0.843  | 1       | 3.3468  | <0.01   |
| PWRMA           | 290 | 7.1934 | 0.1368 | 11.7214 | 0.8542 | 1.0444  | 5.1796  | <0.01   |
| PWMA            | 290 | 7.5739 | 0.1422 | 13.705  | 0.8876 | 1.1069  | 6.8131  | <0.01   |
| Event-based SON | N   | a      | sa     | b       | sb     | rmSSEav | t-value |         |
| OLSR            | 138 | 7.7143 | 0.1222 | 13.2973 | 1.5572 | 1.0069  |         |         |
| RMA             | 138 | 7.8448 | 0.1213 | 14.7225 | 1.5476 | 1.0027  | 0.7534  | 0.45    |
| MA              | 138 | 7.9732 | 0.1242 | 16.1258 | 1.5826 | 1.0068  | 1.4862  | 0.14    |
| PWLSR           | 138 | 8.0415 | 0.1261 | 19.119  | 1.7186 | 1       | 1.8438  | 0.07    |
| PWRMA           | 138 | 8.1749 | 0.1266 | 20.7757 | 1.7256 | 1.0194  | 2.5579  | 0.01    |
| PWMA            | 138 | 8.3065 | 0.1281 | 22.4107 | 1.7463 | 1.0453  | 3.2302  | <0.01   |

Table S9: Slopes, intercepts, and standard errors derived from different regressions methods applied to different types of precipitation. All metrics are as in Table S6.

| Rain  | N   | a      | sa     | b       | sb     | rmSSEav | t-value | p-value |
|-------|-----|--------|--------|---------|--------|---------|---------|---------|
| OLSR  | 514 | 6.6615 | 0.0889 | 4.9455  | 0.5849 | 1.0179  |         |         |
| RMA   | 514 | 6.9574 | 0.0887 | 6.4088  | 0.5865 | 1.0069  | 2.341   | 0.02    |
| MA    | 514 | 7.2541 | 0.0927 | 7.8765  | 0.6099 | 1.0176  | 4.6148  | <0.01   |
| PWLSR | 514 | 7.3314 | 0.0935 | 11.6977 | 0.6652 | 1       | 5.0051  | <0.01   |
| PWRMA | 514 | 7.6294 | 0.0944 | 13.4627 | 0.6718 | 1.0365  | 7.006   | <0.01   |
| PWMA  | 514 | 7.9292 | 0.0972 | 15.2385 | 0.6914 | 1.0856  | 8.8251  | <0.01   |
| Mixed | N   | a      | Sa     | b       | sb     | rmSSEav | t-value |         |
| OLSR  | 113 | 7.6191 | 0.2487 | 12.7937 | 2.5384 | 1.0233  |         |         |
| RMA   | 113 | 8.057  | 0.2465 | 16.9766 | 2.5202 | 1.009   | 1.2366  | 0.22    |
| MA    | 113 | 8.5065 | 0.2626 | 21.2692 | 2.6801 | 1.0231  | 2.4537  | 0.02    |
| PWLSR | 113 | 7.9792 | 0.2094 | 16.1732 | 2.1009 | 1.006   | 1.0192  | 0.31    |
| PWRMA | 113 | 8.2785 | 0.2113 | 18.9864 | 2.1201 | 1.0091  | 1.8458  | 0.07    |
| PWMA  | 113 | 8.5802 | 0.217  | 21.8225 | 2.1775 | 1.0243  | 2.645   | <0.01   |
| Snow  | N   | a      | Sa     | b       | sb     | rmSSEav | t-value |         |
| OLSR  | 241 | 7.995  | 0.1086 | 12.7211 | 1.7801 | 1.0089  |         |         |
| RMA   | 241 | 8.1708 | 0.1081 | 15.4332 | 1.7738 | 1.0035  | 1.1415  | 0.25    |

|       |     |        |        |         |        |        |        |      |
|-------|-----|--------|--------|---------|--------|--------|--------|------|
| MA    | 241 | 8.3452 | 0.1109 | 18.1239 | 1.8181 | 1.0088 | 2.256  | 0.02 |
| PWLSR | 241 | 7.9762 | 0.1174 | 14.1555 | 1.9575 | 1.0085 | 0.1214 | 0.90 |
| PWRMA | 241 | 8.1817 | 0.1181 | 17.4222 | 1.9699 | 1.0036 | 1.2004 | 0.23 |
| PWMA  | 241 | 8.3862 | 0.1203 | 20.6755 | 2.0065 | 1.0128 | 2.4886 | 0.01 |

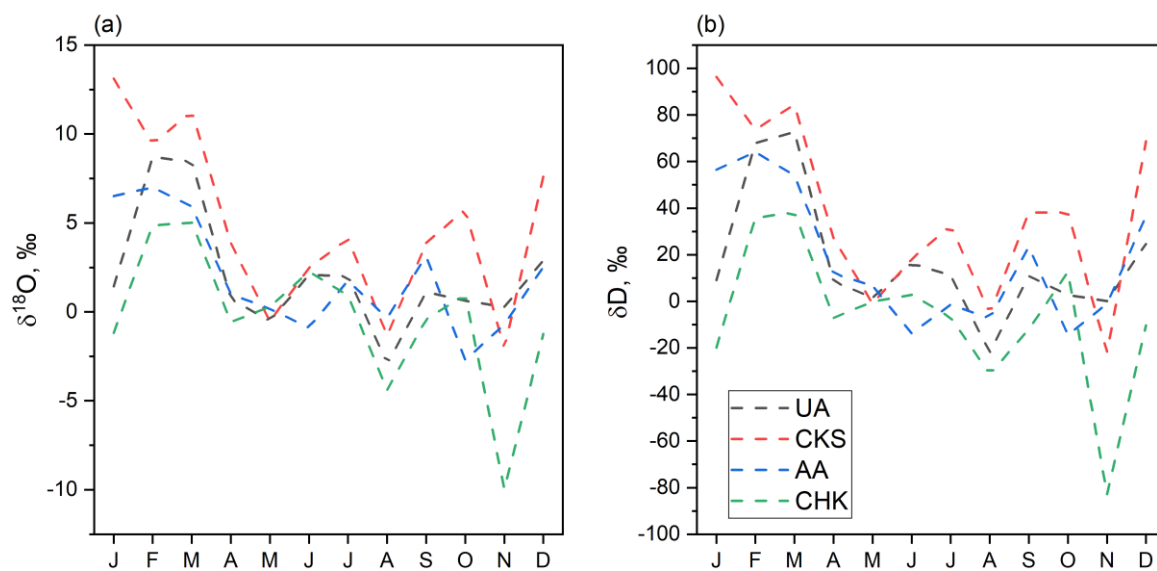

Figure S1: Differences between data obtained in this study and the data from the Waterisotopes Database for (a)  $\delta^{18}\text{O}$ ; (b)  $\delta\text{D}$ .



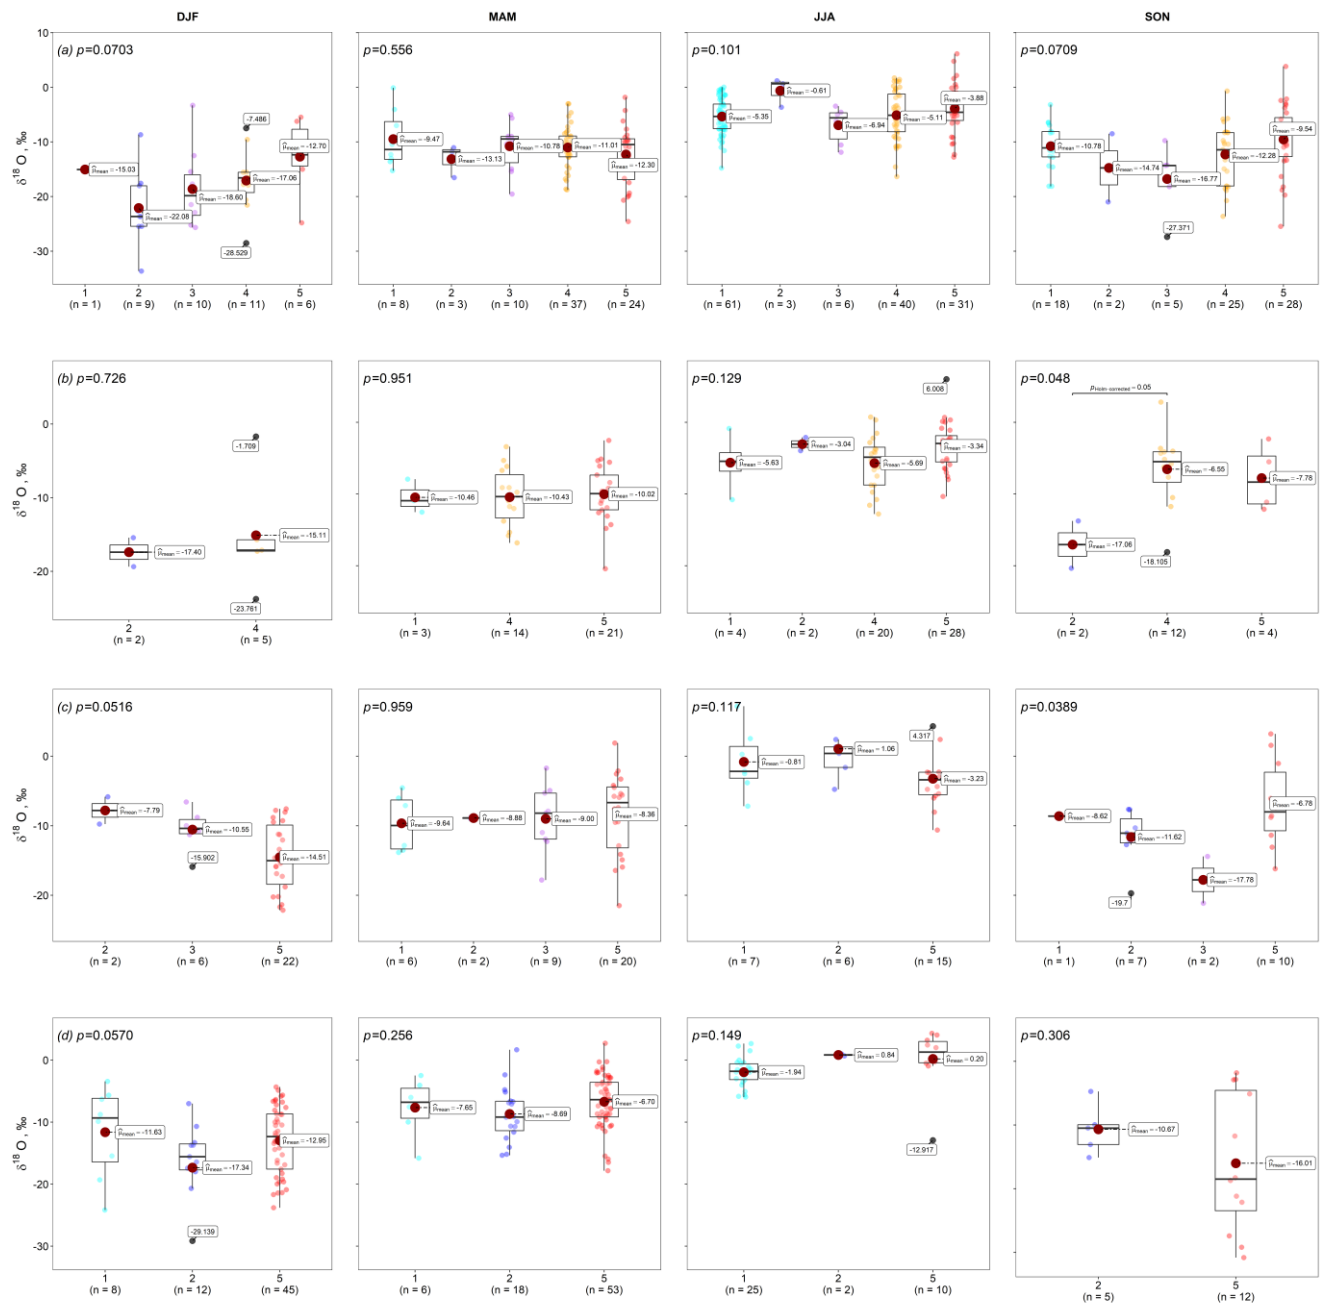

Figure S2: Values of  $\delta^{18}\text{O}$  for each original cluster for each site and season: (a) UA1; (b) CKS2; (c) AA1; (d) CHK1.

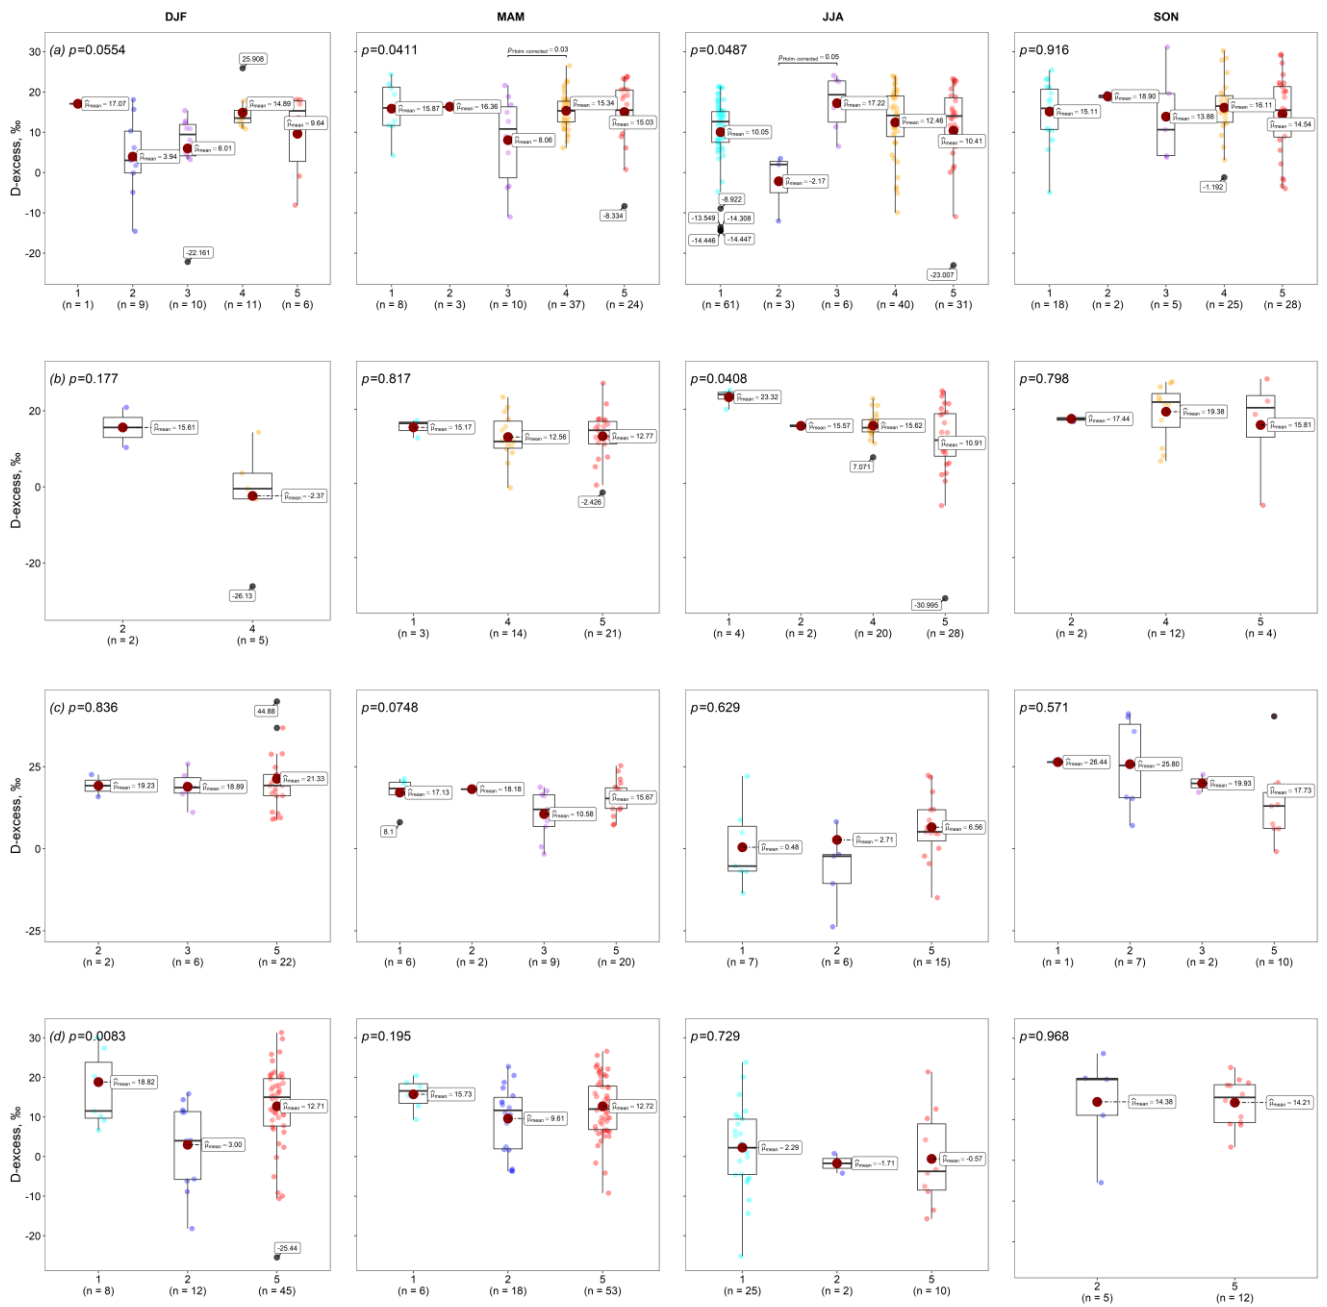

Figure S3: Values of  $d\text{-excess}$  for each original cluster for each site and season: (a) UA1; (b) CKS2; (c) AA1; (d) CHK1.
